# Supplementary material for: How women are treated during facility-based childbirth in four countries: a cross-sectional study with labour observations and community-based surveys
Source: PubMed Central journal article supplement (PMC6853169; doi:10.1016/s0140-6736(19)31992-0), 2019-11-09
Supplement: mmc1.pdf [file mmc1.pdf]

# THE LANCET

## Supplementary appendix

This appendix formed part of the original submission and has been peer reviewed.  
We post it as supplied by the authors.

Supplement to: Bohren MA, Mehrtash H, Fawole B, et al. How women are treated during facility-based childbirth in four countries: a cross-sectional study with labour observations and community-based surveys. *Lancet* 2019; published online Oct 8. [http://dx.doi.org/10.1016/S0140-6736\(19\)31992-0](http://dx.doi.org/10.1016/S0140-6736(19)31992-0).

## Web appendices

Page 2. Facility characteristics table

Page 3. Description of variables.

Page 4. **Labor observation and community survey:** additional sociodemographic information

Page 6. **Labor observation:** Physical abuse, verbal abuse, and stigma and discrimination

Page 7. **Labor observation:** Failure to meet professional standards of care, poor rapport between women and providers, health systems

Page 9. **Labor observation:** Maternal and newborn interventions and health outcomes

Page 11. **Community survey:** Physical abuse, verbal abuse, and stigma and discrimination

Page 12. **Community survey:** Failure to meet professional standards of care, poor rapport between women and providers, health systems

Page 15. Comparison of our study to other mistreatment studies using labor observation and community-based surveys

Page 17. **Labor observation:** Assessing the presence of the Hawthorne effect, by country and month of recruitment, based on any experience of physical abuse, verbal abuse, or stigma and discrimination.

Web appendices

Facility characteristics table

|                                                    | Ghana                                     |                                           |                                         | Guinea     |            |            | Myanmar    |            |            | Nigeria     |                     |             |
|----------------------------------------------------|-------------------------------------------|-------------------------------------------|-----------------------------------------|------------|------------|------------|------------|------------|------------|-------------|---------------------|-------------|
|                                                    | Facility 1                                | Facility 2                                | Facility 3                              | Facility 4 | Facility 5 | Facility 6 | Facility 7 | Facility 8 | Facility 9 | Facility 10 | Facility 11         | Facility 12 |
| <b>Location</b>                                    | Urban                                     | Urban                                     | Urban                                   | Urban      | Urban      | Urban      | Urban      | Urban      | Urban      | Urban       | Urban               | Urban       |
| <b>Management</b>                                  | Public                                    | Public                                    | Public                                  | Public     | Public     | Public     | Public     | Public     | Public     | Public      | Public              | Public      |
| <b>Cost of vaginal birth (USD)</b>                 | \$51-310, depending on insurance coverage | \$41-186, depending on insurance coverage | \$0-41, depending on insurance coverage | Free       | Free       | Free       | Free       | Free       | Free       | \$12        | Free                | Free        |
| <b>Cost of caesarean birth (USD)</b>               | \$206-517 depending on insurance          | \$206-413, depending on insurance         | \$0-206, depending on insurance         | Free       | Free       | Free       | Free       | Free       | Free       | \$218-328   | Free                | Free        |
| <b>Total births per month</b>                      | 790                                       | 560                                       | 251                                     | 207        | 217        | 375        | 1506       | 551        | 305        | 160         | 450                 | 200         |
| <b>Number of beds - obstetrics</b>                 | 261                                       | 113                                       | 56                                      | 15         | 20         | 27         | 270        | 100        | 100        | 90          | 53                  | 57          |
| <b>Caesarean section rate</b>                      | 46%                                       | 48%                                       | 31%                                     | 7%         | 9%         | 12%        | 40%        | 30%        | 31%        | 25%         | 20%                 | 34%         |
| <b># obstetricians per shift</b>                   | 9                                         | 1                                         | 1                                       | 0          | 0          | 6          | 13         | 3          | 1          | 1           | 3 (day), 1 (night)  | 1           |
| <b># medical officers/junior doctors per shift</b> | 10                                        | 7                                         | 2                                       | 5          | 4          | 4          | 1          | 2          | 1          | 3           | 8 (day), 2 (night)  | 1           |
| <b># midwives per shift</b>                        | 19                                        | 10                                        | 7                                       | 2          | 2          | 2          | 10         | 2          | 1          | 6           | 12 (day), 5 (night) | 1           |
| <b>Estimated population of the catchment area</b>  | 315,051*                                  | 148,903*                                  | 216,605                                 | 280,817    | 519,491    | 163,481    | *          | *          | *          | 1,500,000   | 750,000             | 800,000     |
| <b>Facility-based childbirth in catchment area</b> | 92%                                       | 92%                                       | 92%                                     | 39%        | 35%        | 43%        | 69%**      | 69%**      | 69%**      | 75%         | 60%                 | 60%         |

\* Catchment area includes the whole city, not limited to specific neighborhoods

\*\* Rate in the metropolitan area

## **Web appendices**

### **Description of Variables**

In the labor observation, internal validity of the subsample was evaluated by comparing the pattern of abuse one-hour before and after childbirth in two subgroups: the first group of participants for whom labor observation started  $\geq 2$ -hours before birth, and second group of participants for whom labor observation started  $< 2$ -hours but  $> 1$ -hour prior to childbirth.

For both the labor observation and community survey, we developed a few composite indicators. We developed composite indicators to measure the occurrence of the informed consent process (provider explaining the procedure to the woman and the woman agreeing to the procedure) for caesarean section, episiotomy, induction of labor and vaginal examinations. Mobilization was coded as whether a woman was told to mobilize during labor or did mobilize.

In the community survey, we developed a composite indicator for neglect (feeling neglected, like a nuisance, or ignored). Communication was coded as listening to or responding a woman's concerns.

Differences between countries at  $p < 0.01$  significance-level were calculated.

## Web appendices

### Labor observation and community survey: additional sociodemographic information

| Labor observation                                    |       |      |        |      |         |      |       |       |
|------------------------------------------------------|-------|------|--------|------|---------|------|-------|-------|
|                                                      | Ghana |      | Guinea |      | Myanmar |      | Total |       |
|                                                      | n     | %    | n      | %    | n       | %    | n     | %     |
| <b>Overall sample</b>                                | 926   | 45.9 | 682    | 33.8 | 408     | 20.2 | 2016  | 100.0 |
| <b>Number of previous abortions</b>                  |       |      |        |      |         |      |       |       |
| 0                                                    | 669   | 72.2 | 623    | 91.3 | 326     | 79.9 | 1618  | 80.3  |
| 1                                                    | 248   | 26.8 | 57     | 8.4  | 79      | 19.4 | 384   | 19.0  |
| Unknown/don't know                                   | 9     | 1.0  | 2      | 0.3  | 3       | 0.7  | 14    | 0.7   |
| <b>Number of previous miscarriages</b>               |       |      |        |      |         |      |       |       |
| 0                                                    | 792   | 85.5 | 659    | 96.6 | 328     | 80.4 | 1779  | 88.2  |
| ≥1                                                   | 120   | 13.0 | 21     | 3.1  | 76      | 18.6 | 217   | 10.8  |
| Unknown/don't know                                   | 14    | 1.5  | 2      | 0.3  | 4       | 1.0  | 20    | 1.0   |
| <b>HIV status</b>                                    |       |      |        |      |         |      |       |       |
| HIV negative                                         | 889   | 96.0 | 421    | 61.7 | 385     | 94.4 | 1695  | 84.1  |
| HIV positive                                         | 17    | 1.8  | 8      | 1.2  | 9       | 2.2  | 34    | 1.7   |
| Unknown/don't know                                   | 20    | 2.2  | 253    | 37.1 | 14      | 3.4  | 287   | 14.2  |
| <b>Mode of birth for current (labor observation)</b> |       |      |        |      |         |      |       |       |
| Non-instrumental vaginal birth                       | 689   | 74.4 | 531    | 77.9 | 352     | 86.3 | 1572  | 78.0  |
| Instrumental vaginal birth<br>(vacuum/forceps)       | 71    | 7.7  | 27     | 4.0  | 10      | 2.5  | 108   | 5.4   |
| Caesarean birth                                      | 143   | 15.4 | 92     | 13.5 | 26      | 6.4  | 261   | 12.9  |
| Other*                                               | 23    | 2.5  | 32     | 4.7  | 20      | 4.9  | 75    | 3.7   |

Web appendices

| Community survey                                        |       |      |        |      |         |      |         |      |       |       |
|---------------------------------------------------------|-------|------|--------|------|---------|------|---------|------|-------|-------|
|                                                         | Ghana |      | Guinea |      | Myanmar |      | Nigeria |      | Total |       |
|                                                         | n     | %    | n      | %    | n       | %    | n       | %    | n     | %     |
| <b>Overall sample</b>                                   | 836   | 31.3 | 644    | 24.1 | 631     | 23.6 | 561     | 21.0 | 2672  | 100.0 |
| <b>Number of children alive today</b>                   |       |      |        |      |         |      |         |      |       |       |
| 0                                                       | 7     | 0.8  | 17     | 2.6  | 2       | 0.3  | 7       | 1.3  | 33    | 1.2   |
| 1                                                       | 319   | 38.2 | 227    | 35.3 | 358     | 56.7 | 203     | 36.2 | 1107  | 41.4  |
| 2                                                       | 218   | 26.1 | 134    | 20.8 | 162     | 25.7 | 174     | 31.0 | 688   | 25.8  |
| 3                                                       | 140   | 16.8 | 107    | 16.6 | 60      | 9.5  | 92      | 16.4 | 399   | 14.9  |
| ≥4                                                      | 148   | 17.7 | 159    | 24.7 | 49      | 7.8  | 85      | 15.2 | 441   | 16.5  |
| Unknown/don't know                                      | 4     | 0.5  | 0      | 0.0  | 0       | 0.0  | 0       | 0.0  | 4     | 0.2   |
| <b>Currently breastfeeding</b>                          |       |      |        |      |         |      |         |      |       |       |
| No                                                      | 18    | 2.2  | 46     | 7.1  | 14      | 2.2  | 9       | 1.6  | 87    | 3.3   |
| Yes                                                     | 818   | 97.9 | 598    | 92.9 | 616     | 97.6 | 551     | 98.2 | 2583  | 96.7  |
| <b>Breastfeeding initiation</b>                         |       |      |        |      |         |      |         |      |       |       |
| < 1 hour                                                | 407   | 48.7 | 271    | 42.1 | 444     | 70.4 | 218     | 38.9 | 1340  | 50.2  |
| > 1 hour < 24 hours                                     | 326   | 39.0 | 308    | 47.8 | 121     | 19.2 | 253     | 45.1 | 1008  | 37.7  |
| > 24 hours                                              | 88    | 10.5 | 26     | 4.0  | 56      | 8.9  | 83      | 14.8 | 253   | 9.5   |
| Unknown/missing                                         | 15    | 1.8  | 39     | 6.1  | 10      | 1.6  | 7       | 1.3  | 71    | 2.7   |
| <b>Baby Status</b>                                      |       |      |        |      |         |      |         |      |       |       |
| Baby alive at interview                                 | 830   | 97.2 | 612    | 92.5 | 634     | 98.9 | 561     | 98.4 | 2637  | 96.7  |
| Stillbirth                                              | 11    | 1.3  | 29     | 4.4  | 1       | 0.2  | 1       | 0.2  | 42    | 1.5   |
| Very early neonatal death (between birth and discharge) | 4     | 0.5  | 11     | 1.7  | 5       | 0.8  | 6       | 1.1  | 26    | 1.0   |
| Neonatal death (between discharge and interview)        | 7     | 0.8  | 10     | 1.5  | 0       | 0.0  | 2       | 0.4  | 19    | 0.7   |
| Unknown                                                 | 2     | 0.2  | 0      | 0.0  | 1       | 0.2  | 0       | 0.0  | 3     | 0.1   |

## Web appendices

### Labor observation: Physical abuse, verbal abuse, and stigma and discrimination

|                                                                       | Ghana |      | Guinea |      | Nigeria |      | Total |       |
|-----------------------------------------------------------------------|-------|------|--------|------|---------|------|-------|-------|
|                                                                       | n     | %    | n      | %    | n       | %    | n     | %     |
| Overall sample                                                        | 926   | 45.9 | 682    | 33.8 | 408     | 20.2 | 2016  | 100.0 |
| <b>Any physical abuse, verbal abuse, or stigma and discrimination</b> | 293   | 31.6 | 269    | 39.4 | 276     | 67.7 | 838   | 41.6  |
| <b>Any physical abuse</b>                                             | 73    | 7.9  | 104    | 15.2 | 105     | 25.7 | 282   | 14.0  |
| Slap                                                                  | 58    | 6.3  | 1      | 0.1  | 94      | 23.0 | 153   | 7.6   |
| Forceful downward pressure on abdomen                                 | 4     | 0.4  | 50     | 7.3  | 9       | 2.2  | 63    | 3.1   |
| Held down to the bed forcefully                                       | 12    | 1.3  | 17     | 2.5  | 9       | 2.2  | 38    | 1.9   |
| Punch                                                                 | 1     | 0.1  | 23     | 3.4  | 4       | 1    | 28    | 1.4   |
| Hit                                                                   | 0     | 0    | 5      | 0.7  | 2       | 0.5  | 7     | 0.4   |
| Kick                                                                  | 1     | 0.1  | 1      | 0.1  | 3       | 0.7  | 5     | 0.3   |
| Pinch                                                                 | 2     | 0.2  | 1      | 0.1  | 0       | 0    | 3     | 0.2   |
| Gag                                                                   | 2     | 0.2  | 1      | 0.1  | 0       | 0    | 3     | 0.2   |
| Tied to the bed                                                       | 0     | 0    | 0      | 0    | 0       | 0    | 0     | 0.0   |
| Other physical abuse                                                  | 9     | 1    | 27     | 4    | 6       | 1.5  | 42    | 2.1   |
| <b>Any verbal abuse</b>                                               | 272   | 29.4 | 228    | 33.4 | 262     | 64.2 | 762   | 37.8  |
| Shouted at                                                            | 190   | 20.5 | 144    | 21.1 | 214     | 52.5 | 548   | 27.2  |
| Scolded                                                               | 75    | 8.1  | 81     | 11.9 | 106     | 26.0 | 262   | 13.0  |
| Mocked                                                                | 22    | 2.4  | 52     | 7.6  | 88      | 21.6 | 162   | 8.0   |
| Insulted                                                              | 25    | 2.7  | 17     | 2.5  | 82      | 20.1 | 124   | 6.2   |
| Threatened with poor outcome for baby                                 | 27    | 2.9  | 14     | 2.1  | 33      | 8.1  | 74    | 3.7   |
| Hissed at                                                             | 17    | 1.8  | 15     | 2.2  | 33      | 8.1  | 65    | 3.2   |
| Negative comments - her sexual activity                               | 33    | 3.6  | 5      | 0.7  | 22      | 5.4  | 60    | 3.0   |
| Threatened with medical procedure                                     | 19    | 2.1  | 5      | 0.7  | 17      | 4.2  | 41    | 2.0   |
| Negative comments - her appearance                                    | 15    | 1.6  | 4      | 0.6  | 21      | 5.1  | 40    | 2.0   |
| Threatened to withhold care                                           | 13    | 1.4  | 2      | 0.3  | 18      | 4.4  | 33    | 1.6   |
| Negative comments - baby's appearance                                 | 5     | 0.5  | 8      | 1.2  | 7       | 1.7  | 20    | 1.0   |
| Threatened with physical violence                                     | 5     | 0.5  | 7      | 1    | 7       | 1.7  | 19    | 0.9   |
| Blamed woman for poor outcome                                         | 3     | 0.3  | 1      | 0.1  | 5       | 1.2  | 9     | 0.4   |
| <b>Any stigma and discrimination</b>                                  | 6     | 0.7  | 5      | 0.7  | 0       | 0    | 11    | 0.6   |
| Race/ethnicity                                                        | 1     | 0.1  | 4      | 0.6  | 0       | 0    | 5     | 0.3   |
| Economic circumstances                                                | 2     | 0.2  | 0      | 0    | 0       | 0    | 2     | 0.1   |
| Age                                                                   | 1     | 0.1  | 0      | 0    | 0       | 0    | 1     | 0.1   |
| Marital status                                                        | 0     | 0    | 1      | 0.1  | 0       | 0    | 1     | 0.1   |
| Level of education/literacy                                           | 0     | 0    | 0      | 0    | 0       | 0    | 0     | 0.0   |
| Religion                                                              | 0     | 0    | 0      | 0    | 0       | 0    | 0     | 0.0   |
| HIV status                                                            | 0     | 0    | 0      | 0    | 0       | 0    | 0     | 0.0   |
| Other stigma/discrimination                                           | 2     | 0.2  | 1      | 0.1  | 0       | 0    | 3     | 0.2   |

## Web appendices

### Labor observation: Failure to meet professional standards of care, poor rapport between women and providers, health systems

|                                                                                                                     | Ghana |      | Guinea |      | Nigeria |      | Total |       |
|---------------------------------------------------------------------------------------------------------------------|-------|------|--------|------|---------|------|-------|-------|
|                                                                                                                     | n     | %    | n      | %    | n       | %    | n     | %     |
| Overall sample                                                                                                      | 926   | 45.9 | 682    | 33.8 | 408     | 20.2 | 2016  | 100.0 |
| <b>Informed consent and confidentiality</b>                                                                         |       |      |        |      |         |      |       |       |
| <i>Procedure explained and woman agreed to the procedure</i>                                                        |       |      |        |      |         |      |       |       |
| <b>Caesarean section (n=261)</b>                                                                                    | 143   | 15.4 | 92     | 13.5 | 26      | 6.4  | 261   | 12.9  |
| Not explained, did not agree                                                                                        | 0     | 0.0  | 9      | 9.8  | 0       | 0.0  | 9     | 3.5   |
| Not explained, agreed                                                                                               | 13    | 9.1  | 9      | 9.8  | 3       | 11.5 | 25    | 9.6   |
| Explained, did not agree                                                                                            | 0     | 0.0  | 1      | 1.1  | 0       | 0.0  | 1     | 0.4   |
| Explained and agreed                                                                                                | 125   | 87.4 | 73     | 79.4 | 23      | 88.5 | 221   | 84.7  |
| Don't know/refuse/missing                                                                                           | 5     | 3.5  | 0      | 0.0  | 0       | 0.0  | 5     | 2.0   |
| <b>Episiotomy (n=1680 women with vaginal birth)</b>                                                                 | 128   | 16.8 | 25     | 4.5  | 100     | 27.6 | 253   | 15.1  |
| Not explained, did not agree                                                                                        | 75    | 58.6 | 20     | 80.0 | 57      | 55.3 | 151   | 59.7  |
| Not explained, agreed                                                                                               | 10    | 7.8  | 2      | 8.0  | 8       | 7.8  | 20    | 7.9   |
| Explained, did not agree                                                                                            | 11    | 8.6  | 0      | 0.0  | 8       | 8.0  | 19    | 7.5   |
| Explained and agreed                                                                                                | 29    | 22.7 | 3      | 12.0 | 24      | 24.0 | 56    | 22.1  |
| Don't know/refuse                                                                                                   | 3     | 2.3  | 0      | 0.0  | 4       | 3.9  | 7     | 2.7   |
| <b>Vaginal exams</b>                                                                                                |       |      |        |      |         |      |       |       |
| <i>Before a vaginal examination, staff informed woman why a vaginal exam was needed and obtained her permission</i> |       |      |        |      |         |      |       |       |
| <b>First vaginal exam</b>                                                                                           |       |      |        |      |         |      |       |       |
| Did not have any vaginal exam during observation period                                                             | 162   | 17.5 | 337    | 49.4 | 82      | 20.1 | 581   | 28.8  |
| Not informed, permission not obtained                                                                               | 215   | 23.2 | 105    | 15.4 | 92      | 22.6 | 412   | 28.7  |
| Not informed, permission obtained                                                                                   | 216   | 23.3 | 55     | 8.1  | 77      | 18.9 | 348   | 24.3  |
| Informed, permission not obtained                                                                                   | 31    | 3.4  | 6      | 0.9  | 50      | 12.3 | 87    | 6.1   |
| Informed and permission obtained                                                                                    | 300   | 32.4 | 177    | 26.0 | 104     | 25.5 | 581   | 40.5  |
| Don't know/refuse                                                                                                   | 2     | 0.2  | 2      | 0.3  | 3       | 0.7  | 7     | 0.5   |
| <b>Across all vaginal exams</b>                                                                                     |       |      |        |      |         |      |       |       |
| Total # of vaginal exams conducted                                                                                  | 2286  | 52.0 | 1051   | 23.9 | 1056    | 24.0 | 4393  | -     |
| Not informed, permission not obtained                                                                               | 632   | 27.6 | 294    | 28.0 | 305     | 28.9 | 1231  | 28.0  |
| Not informed, permission obtained                                                                                   | 676   | 29.6 | 155    | 14.7 | 280     | 26.5 | 1111  | 25.3  |
| Informed, permission not obtained                                                                                   | 100   | 4.4  | 20     | 1.9  | 149     | 14.1 | 269   | 6.1   |
| Informed and permission obtained                                                                                    | 878   | 38.4 | 582    | 55.4 | 322     | 30.5 | 1782  | 40.6  |
| <b>Pain relief</b>                                                                                                  |       |      |        |      |         |      |       |       |
| <b>Woman requested and received pain relief</b>                                                                     |       |      |        |      |         |      |       |       |
| Not requested, not received                                                                                         | 877   | 94.7 | 599    | 87.8 | 398     | 97.6 | 1874  | 93.0  |
| Requested, not received                                                                                             | 19    | 2.1  | 23     | 3.4  | 6       | 1.5  | 48    | 2.4   |
| Requested and received                                                                                              | 30    | 3.2  | 60     | 8.8  | 4       | 1.0  | 94    | 4.7   |
| <b>Neglect and abandonment</b>                                                                                      |       |      |        |      |         |      |       |       |
| <b>Staff member present when the baby came out (n=1680 women with vaginal birth)</b>                                |       |      |        |      |         |      |       |       |
| No                                                                                                                  | 17    | 2.2  | 43     | 7.7  | 15      | 4.1  | 75*   | 4.5   |
| Yes                                                                                                                 | 743   | 97.8 | 515    | 92.3 | 347     | 95.9 | 1605  | 92.9  |
| Missing                                                                                                             | 0     | 0    | 0      | 0    | 0       | 0    | 0     | 0     |
| <b>Supportive care</b>                                                                                              |       |      |        |      |         |      |       |       |
| <b>Woman offered to have a labor companion during labor and birth</b>                                               |       |      |        |      |         |      |       |       |
| No                                                                                                                  | 868   | 93.7 | 606    | 88.9 | 397     | 97.3 | 1871  | 92.8  |
| Yes                                                                                                                 | 58    | 6.3  | 75     | 11.0 | 11      | 2.7  | 144   | 7.1   |
| Missing                                                                                                             | 0     | 0.0  | 1      | 0.2  | 0       | 0.0  | 1     | 0.1   |
| <b>Companion present at any time during labor and birth</b>                                                         |       |      |        |      |         |      |       |       |
| No                                                                                                                  | 868   | 93.7 | 638    | 93.6 | 384     | 94.1 | 1890  | 93.8  |
| Yes                                                                                                                 | 58    | 6.3  | 44     | 6.5  | 24      | 5.9  | 126   | 6.3   |
| <b>Companion present at the time of birth</b>                                                                       |       |      |        |      |         |      |       |       |
| No                                                                                                                  | 830   | 89.6 | 624    | 91.5 | 356     | 87.3 | 1810  | 89.8  |
| Yes                                                                                                                 | 82    | 8.9  | 31     | 4.6  | 51      | 12.5 | 164   | 8.1   |
| Missing                                                                                                             | 14    | 1.5  | 27     | 4.0  | 1       | 0.3  | 42    | 2.1   |
| <b>Autonomy</b>                                                                                                     |       |      |        |      |         |      |       |       |



## Web appendices

|                                                                                                                                          |     |       |     |      |     |      |      |      |
|------------------------------------------------------------------------------------------------------------------------------------------|-----|-------|-----|------|-----|------|------|------|
| <b>Woman had easy access to water or oral fluids during labor (n=1680 women with vaginal birth)</b>                                      |     |       |     |      |     |      |      |      |
| No                                                                                                                                       | 326 | 42.9  | 164 | 29.4 | 162 | 44.8 | 652* | 38.8 |
| Yes                                                                                                                                      | 434 | 57.1  | 393 | 70.4 | 199 | 54.9 | 1026 | 61.1 |
| Unknown/don't know                                                                                                                       | 0   | 0.0   | 1   | 0.2  | 1   | 0.3  | 2    | 0.1  |
| <b>Woman told she could mobilize during labor, and if she mobilized during labor</b>                                                     |     |       |     |      |     |      |      |      |
| Not told, did not mobilize                                                                                                               | 693 | 74.8  | 129 | 18.9 | 322 | 78.9 | 1144 | 56.8 |
| Told, did not mobilize                                                                                                                   | 16  | 1.7   | 11  | 1.6  | 2   | 0.5  | 29   | 1.4  |
| Not told, mobilized                                                                                                                      | 13  | 1.4   | 23  | 3.4  | 62  | 15.2 | 98   | 4.9  |
| Told and mobilized                                                                                                                       | 204 | 22.0  | 519 | 76.1 | 21  | 5.2  | 744  | 36.9 |
| Don't know/refuse                                                                                                                        | 0   | 0.0   | 0   | 0.0  | 1   | 0.3  | 1    | 0.1  |
| <b>Woman asked for her preferred birthing position</b>                                                                                   |     |       |     |      |     |      |      |      |
| No                                                                                                                                       | 880 | 95.0  | 635 | 93.0 | 387 | 94.9 | 1902 | 94.4 |
| Yes                                                                                                                                      | 14  | 1.5   | 14  | 2.1  | 0   | 0.0  | 28   | 1.4  |
| Unknown/don't know                                                                                                                       | 32  | 3.5   | 33  | 4.8  | 21  | 5.2  | 86   | 4.3  |
| <b>Birth position (for women with non-instrumental vaginal birth, n=1572)</b>                                                            |     |       |     |      |     |      |      |      |
| Dorsal/supine                                                                                                                            | 295 | 42.8  | 519 | 97.7 | 314 | 89.2 | 1128 | 71.8 |
| Lithotomy                                                                                                                                | 384 | 55.7  | 8   | 1.5  | 37  | 10.5 | 429  | 27.3 |
| On all fours                                                                                                                             | 0   | 0.0   | 1   | 0.2  | 0   | 0.0  | 1    | 0.1  |
| Squatting or sitting                                                                                                                     | 3   | 0.4   | 3   | 0.6  | 0   | 0.0  | 6    | 0.4  |
| Lying on her side                                                                                                                        | 6   | 0.9   | 0   | 0.0  | 0   | 0.0  | 6    | 0.4  |
| Other/unknown                                                                                                                            | 1   | 0.2   | 0   | 0.0  | 1   | 0.3  | 2    | 0.1  |
| <b>Woman instructed to clean up blood, urine, feces or amniotic fluid</b>                                                                |     |       |     |      |     |      |      |      |
| No                                                                                                                                       | 926 | 100.0 | 681 | 99.9 | 402 | 98.5 | 2009 | 99.7 |
| Yes                                                                                                                                      | 0   | 0.0   | 1   | 0.2  | 6   | 1.5  | 7    | 0.4  |
| <b>Staff suggested or asked the woman or companion for a bribe, informal payment, or gift</b>                                            |     |       |     |      |     |      |      |      |
| No                                                                                                                                       | 920 | 99.4  | 640 | 93.8 | 394 | 96.6 | 1954 | 96.9 |
| Yes                                                                                                                                      | 6   | 0.6   | 42  | 6.2  | 14  | 3.4  | 62   | 3.1  |
| <b>Curtains, partitions, or other measures used to provide privacy for the woman throughout labor, childbirth and postpartum periods</b> |     |       |     |      |     |      |      |      |
| Yes                                                                                                                                      | 755 | 81.5  | 237 | 34.8 | 26  | 6.4  | 1018 | 50.5 |
| No                                                                                                                                       | 73  | 7.9   | 341 | 50.0 | 340 | 83.3 | 754  | 37.4 |
| Used during some but not all periods                                                                                                     | 95  | 10.3  | 104 | 15.3 | 28  | 6.9  | 227  | 11.3 |
| Unknown/don't know                                                                                                                       | 3   | 0.3   | 0   | 0    | 14  | 3.4  | 17   | 0.8  |

\* Was the procedure explained and did the woman agree to the procedure?

\*\* Before a vaginal examination, did staff inform woman why a vaginal exam was needed and obtain permission?

## Web appendices

### Labor observation: Maternal and newborn interventions and health outcomes

|                                                                               | Ghana |      | Guinea |      | Nigeria |      | Total |      |
|-------------------------------------------------------------------------------|-------|------|--------|------|---------|------|-------|------|
|                                                                               | n     | %    | n      | %    | n       | %    | n     | %    |
| <b>Maternal interventions</b>                                                 |       |      |        |      |         |      |       |      |
| <b>Induction of labor</b>                                                     |       |      |        |      |         |      |       |      |
| No                                                                            | 669   | 72.2 | 602    | 88.3 | 375     | 91.9 | 1646  | 81.6 |
| Yes                                                                           | 237   | 25.6 | 25     | 3.7  | 16      | 3.9  | 278   | 13.8 |
| Unknown/don't know/missing                                                    | 20    | 2.2  | 55     | 8.1  | 17      | 4.2  | 92    | 4.6  |
| <b>Augmentation of labor</b>                                                  |       |      |        |      |         |      |       |      |
| No                                                                            | 373   | 40.3 | 252    | 37.0 | 198     | 48.5 | 823   | 40.8 |
| Yes                                                                           | 529   | 57.1 | 401    | 58.8 | 196     | 48.0 | 1126  | 55.9 |
| Unknown/don't know/missing                                                    | 24    | 2.6  | 29     | 4.3  | 14      | 3.4  | 67    | 3.3  |
| <b>Perineal shaving</b>                                                       |       |      |        |      |         |      |       |      |
| No                                                                            | 821   | 88.7 | 645    | 94.6 | 356     | 87.3 | 1822  | 90.4 |
| Yes                                                                           | 82    | 8.9  | 7      | 1.0  | 36      | 8.8  | 125   | 6.2  |
| Unknown/don't know/missing                                                    | 23    | 2.5  | 30     | 4.4  | 16      | 3.9  | 69    | 3.4  |
| <b>Enema</b>                                                                  |       |      |        |      |         |      |       |      |
| No                                                                            | 901   | 97.3 | 641    | 94.0 | 391     | 95.8 | 1933  | 95.9 |
| Yes                                                                           | 1     | 0.1  | 11     | 1.6  | 0       | 0.0  | 12    | 0.6  |
| Unknown/don't know/missing                                                    | 24    | 2.6  | 30     | 4.4  | 17      | 4.2  | 71    | 3.5  |
| <b>Perineal tear</b>                                                          |       |      |        |      |         |      |       |      |
| No tear                                                                       | 560   | 60.5 | 545    | 79.9 | 304     | 74.5 | 1409  | 69.9 |
| First degree tear                                                             | 232   | 25.1 | 86     | 12.6 | 57      | 14.0 | 375   | 18.6 |
| Second degree tear                                                            | 72    | 7.8  | 11     | 1.6  | 15      | 3.7  | 98    | 4.9  |
| Third- or fourth-degree tear                                                  | 17    | 1.8  | 1      | 0.1  | 2       | 0.5  | 20    | 1.0  |
| Unknown/don't know/missing                                                    | 45    | 4.9  | 39     | 5.7  | 30      | 7.4  | 114   | 5.7  |
| <b>Perineal repair or suture performed (n=118)</b>                            |       |      |        |      |         |      |       |      |
| No                                                                            | 1     | 1.1  | 1      | 8.3  | 2       | 11.8 | 4     | 3.4  |
| Yes                                                                           | 87    | 97.8 | 11     | 91.7 | 15      | 88.2 | 113   | 95.8 |
| Unknown/don't know/missing                                                    | 1     | 1.1  | 0      | 0.0  | 0       | 0.0  | 1     | 0.8  |
| <b>Local anesthetic used during perineal repair (n=113)</b>                   |       |      |        |      |         |      |       |      |
| No                                                                            | 9     | 10.3 | 1      | 9.1  | 6       | 40.0 | 16    | 14.2 |
| Yes                                                                           | 78    | 89.7 | 10     | 90.9 | 9       | 60.0 | 97    | 85.8 |
| <b>Maternal health outcomes</b>                                               |       |      |        |      |         |      |       |      |
| <b>Birth position (for women with non-instrumental vaginal birth, n=1572)</b> |       |      |        |      |         |      |       |      |
| Dorsal/supine                                                                 | 295   | 42.8 | 519    | 97.7 | 314     | 89.2 | 1128  | 71.8 |
| Lithotomy                                                                     | 384   | 55.7 | 8      | 1.5  | 37      | 10.5 | 429   | 27.3 |
| On all fours                                                                  | 0     | 0.0  | 1      | 0.2  | 0       | 0.0  | 1     | 0.1  |
| Squatting or sitting                                                          | 3     | 0.4  | 3      | 0.6  | 0       | 0.0  | 6     | 0.4  |
| Lying on her side                                                             | 6     | 0.9  | 0      | 0.0  | 0       | 0.0  | 6     | 0.4  |
| Other/unknown                                                                 | 1     | 0.2  | 0      | 0.0  | 1       | 0.3  | 2     | 0.1  |
| <b>Mode of childbirth</b>                                                     |       |      |        |      |         |      |       |      |
| Non-instrumental vaginal birth                                                | 689   | 74.4 | 531    | 77.9 | 352     | 86.3 | 1572  | 78.0 |
| Instrumental vaginal birth (vacuum/forceps)                                   | 71    | 7.7  | 27     | 4.0  | 10      | 2.5  | 108   | 5.4  |
| Caesarean section                                                             | 143   | 15.4 | 92     | 13.5 | 26      | 6.4  | 261   | 12.9 |
| Other/unknown/missing                                                         | 23    | 2.5  | 32     | 4.7  | 20      | 4.9  | 75    | 3.7  |
| <b>Maternal admission to intensive care*</b>                                  |       |      |        |      |         |      |       |      |
| No                                                                            | 870   | 94.0 | 638    | 93.5 | 373     | 91.4 | 1881  | 93.3 |
| Yes                                                                           | 36    | 3.9  | 14     | 2.1  | 16      | 3.9  | 66    | 3.3  |
| Unknown/don't know/missing                                                    | 20    | 2.2  | 30     | 4.4  | 19      | 4.7  | 69    | 3.4  |
| <b>Maternal transfer to another hospital*</b>                                 |       |      |        |      |         |      |       |      |
| No                                                                            | 901   | 97.3 | 650    | 95.3 | 386     | 94.6 | 1937  | 96.1 |
| Yes                                                                           | 3     | 0.3  | 3      | 0.4  | 7       | 1.7  | 13    | 0.6  |
| Unknown/don't know/missing                                                    | 22    | 2.4  | 29     | 4.3  | 15      | 3.7  | 66    | 3.3  |
| <b>Maternal discharge*</b>                                                    |       |      |        |      |         |      |       |      |
| No                                                                            | 908   | 98.1 | 604    | 88.6 | 390     | 95.6 | 1902  | 94.3 |
| Yes                                                                           | 0     | 0.0  | 49     | 7.2  | 5       | 1.2  | 54    | 2.7  |
| Unknown/don't know/missing                                                    | 18    | 1.9  | 29     | 4.3  | 13      | 3.2  | 60    | 3.0  |
| <b>Maternal status at end of observation*</b>                                 |       |      |        |      |         |      |       |      |
| Alive                                                                         | 907   | 97.9 | 652    | 95.6 | 394     | 96.6 | 1953  | 96.9 |
| Dead                                                                          | 2     | 0.2  | 3      | 0.4  | 0       | 0.0  | 5     | 0.2  |
| Unknown/don't know/missing                                                    | 17    | 1.8  | 27     | 4.0  | 14      | 3.4  | 58    | 2.9  |
| <b>Newborn health outcomes</b>                                                |       |      |        |      |         |      |       |      |

## Web appendices

|                                                       |     |      |     |      |     |      |      |      |
|-------------------------------------------------------|-----|------|-----|------|-----|------|------|------|
| <b>Singleton or multiple birth</b>                    |     |      |     |      |     |      |      |      |
| Singleton (1 baby)                                    | 894 | 96.5 | 632 | 92.7 | 397 | 97.3 | 1923 | 95.4 |
| Multiple (set of twins)                               | 18  | 1.9  | 23  | 3.4  | 10  | 2.5  | 51   | 2.5  |
| Unknown/don't know/missing                            | 14  | 1.5  | 27  | 4.0  | 1   | 0.2  | 42   | 2.1  |
| <b>Sex of the baby (n=2025 babies)</b>                |     |      |     |      |     |      |      |      |
| Female                                                | 438 | 47.1 | 315 | 46.5 | 199 | 47.7 | 952  | 47.0 |
| Male                                                  | 485 | 52.2 | 361 | 53.2 | 218 | 52.3 | 1064 | 52.5 |
| Unknown                                               | 7   | 0.8  | 2   | 0.3  | 0   | 0.0  | 9    | 0.4  |
| <b>Baby status at birth</b>                           |     |      |     |      |     |      |      |      |
| Baby alive at birth                                   | 919 | 98.8 | 642 | 94.7 | 392 | 94.0 | 1953 | 96.4 |
| Fresh stillbirth                                      | 3   | 0.3  | 24  | 3.5  | 4   | 1.0  | 31   | 1.5  |
| Macerated stillbirth                                  | 5   | 0.5  | 11  | 1.6  | 3   | 0.7  | 19   | 0.9  |
| Unknown/don't know/missing                            | 3   | 0.3  | 1   | 0.1  | 18  | 4.3  | 22   | 1.1  |
| <b>Baby status at end of observation period</b>       |     |      |     |      |     |      |      |      |
| Baby admitted to special care baby unit               | 124 | 13.3 | 14  | 2.1  | 53  | 12.8 | 191  | 9.4  |
| Very early infant death (birth to 2 hours postpartum) | 15  | 1.6  | 17  | 2.6  | 12  | 1.5  | 44   | 2.3  |

## Web appendices

### Community survey: Physical abuse, verbal abuse, and stigma and discrimination

|                                                                        | Ghana |      | Guinea |      | Myanmar |      | Nigeria |      | Total |       |
|------------------------------------------------------------------------|-------|------|--------|------|---------|------|---------|------|-------|-------|
|                                                                        | n     | %    | n      | %    | n       | %    | n       | %    | n     | %     |
| <b>Overall sample</b>                                                  | 836   | 31.3 | 644    | 24.1 | 631     | 23.6 | 561     | 21.0 | 2672  | 100.0 |
| <b>Any physical abuse, verbal abuse, or stigma and discrimination*</b> | 308   | 36.8 | 235    | 36.5 | 131     | 20.8 | 271     | 48.3 | 945   | 35.4  |
| <b>Any physical abuse*</b>                                             | 52    | 6.2  | 124    | 19.3 | 21      | 3.3  | 90      | 16.0 | 287   | 10.7  |
| Slap                                                                   | 33    | 4.0  | 4      | 0.6  | 5       | 0.8  | 62      | 11.1 | 104   | 3.9   |
| Forceful downward pressure on the abdomen                              | 13    | 1.6  | 101    | 15.7 | 14      | 2.2  | 30      | 5.4  | 158   | 5.9   |
| Pinch                                                                  | 2     | 0.2  | 5      | 0.8  | 2       | 0.3  | 8       | 1.4  | 17    | 0.6   |
| Held down to the bed forcefully                                        | 4     | 0.5  | 10     | 1.6  | 0       | 0.0  | 3       | 0.5  | 17    | 0.6   |
| Hit                                                                    | 0     | 0.0  | 4      | 0.6  | 3       | 0.5  | 6       | 1.1  | 13    | 0.5   |
| Punch                                                                  | 0     | 0.0  | 8      | 1.2  | 0       | 0.0  | 4       | 0.7  | 12    | 0.4   |
| Kick                                                                   | 1     | 0.1  | 2      | 0.3  | 0       | 0.0  | 3       | 0.5  | 6     | 0.2   |
| Gag                                                                    | 1     | 0.1  | 2      | 0.3  | 0       | 0.0  | 3       | 0.5  | 6     | 0.2   |
| Tied to the bed                                                        | 1     | 0.1  | 0      | 0    | 2       | 0.3  | 0       | 0.0  | 3     | 0.1   |
| Other physical abuse                                                   | 0     | 0.0  | 1      | 0.2  | 0       | 0.0  | 2       | 0.4  | 3     | 0.1   |
| <b>Any verbal abuse*</b>                                               | 284   | 34.0 | 173    | 26.9 | 116     | 18.4 | 248     | 44.2 | 821   | 30.7  |
| Shouted at                                                             | 187   | 22.4 | 111    | 17.2 | 75      | 11.9 | 160     | 28.5 | 533   | 20.0  |
| Scolded                                                                | 79    | 9.5  | 63     | 9.8  | 45      | 7.1  | 70      | 12.5 | 257   | 9.6   |
| Threatened with poor outcome for baby                                  | 78    | 9.3  | 27     | 4.2  | 9       | 1.4  | 69      | 12.3 | 183   | 6.9   |
| Mocked                                                                 | 40    | 4.8  | 42     | 6.5  | 6       | 1.0  | 45      | 8.0  | 133   | 5.0   |
| Threatened with medical procedure                                      | 55    | 6.6  | 23     | 3.6  | 6       | 1.0  | 48      | 8.6  | 132   | 4.9   |
| Insulted                                                               | 35    | 4.2  | 13     | 2.0  | 8       | 1.3  | 73      | 13.0 | 129   | 4.8   |
| Hissed at                                                              | 13    | 1.6  | 11     | 1.7  | 24      | 3.8  | 29      | 5.2  | 77    | 2.9   |
| Threatened to withhold care                                            | 29    | 3.5  | 2      | 0.3  | 1       | 0.2  | 32      | 5.7  | 64    | 2.4   |
| Negative comments - her sexual activity                                | 19    | 2.3  | 5      | 0.8  | 6       | 1.0  | 22      | 3.9  | 52    | 2.0   |
| Blamed woman for poor outcome                                          | 10    | 1.2  | 10     | 1.6  | 6       | 1.0  | 18      | 3.2  | 44    | 1.7   |
| Negative comments - her appearance                                     | 11    | 1.3  | 6      | 1.0  | 1       | 0.2  | 9       | 1.6  | 27    | 1.0   |
| Negative comments - baby's appearance                                  | 4     | 0.5  | 3      | 0.5  | 0       | 0.0  | 13      | 2.3  | 20    | 0.8   |
| Threatened with physical violence                                      | 5     | 0.6  | 6      | 0.9  | 1       | 0.2  | 3       | 0.5  | 15    | 0.6   |
| Other verbal abuse                                                     | 2     | 0.2  | 1      | 0.2  | 0       | 0.0  | 4       | 0.7  | 7     | 0.3   |
| <b>Any stigma and discrimination*</b>                                  | 31    | 3.7  | 9      | 1.4  | 11      | 1.7  | 28      | 5.0  | 79    | 3.0   |
| Age                                                                    | 17    | 2.0  | 1      | 0.2  | 6       | 1.0  | 4       | 0.7  | 28    | 1.1   |
| Economic circumstances                                                 | 6     | 0.7  | 2      | 0.3  | 3       | 0.5  | 12      | 2.1  | 23    | 0.9   |
| Race/ethnicity                                                         | 5     | 0.6  | 4      | 0.6  | 1       | 0.2  | 8       | 1.4  | 18    | 0.7   |
| Level of education/literacy                                            | 7     | 0.8  | 0      | 0.0  | 1       | 0.2  | 4       | 0.7  | 12    | 0.5   |
| Marital status                                                         | 2     | 0.2  | 2      | 0.3  | 2       | 0.3  | 6       | 1.1  | 12    | 0.5   |
| Religion                                                               | 2     | 0.2  | 0      | 0.0  | 0.0     | 0.0  | 5       | 0.9  | 7     | 0.3   |
| HIV status                                                             | 2     | 0.2  | 1      | 0.2  | 0.0     | 0.0  | 0       | 0.0  | 3     | 0.1   |

\* Per woman, so subcategories may not total the summary categories if women experienced >1 subcategory

## Web appendices

### Community survey: Failure to meet professional standards of care, poor rapport between women and providers, health systems

|                                                                                                                  | Ghana |      | Guinea |      | Myanmar |      | Nigeria |      | Total |      |
|------------------------------------------------------------------------------------------------------------------|-------|------|--------|------|---------|------|---------|------|-------|------|
|                                                                                                                  | n     | %    | n      | %    | n       | %    | n       | %    | n     | %    |
| <b>Failure to meet professional standards</b>                                                                    |       |      |        |      |         |      |         |      |       |      |
| <b><i>Informed consent and confidentiality</i></b>                                                               |       |      |        |      |         |      |         |      |       |      |
| <i>Was the procedure explained and did you agree to the procedure?</i>                                           |       |      |        |      |         |      |         |      |       |      |
| <b>Caesarean section</b>                                                                                         | 118   | 14.1 | 76     | 11.8 | 267     | 42.3 | 22      | 3.9  | 483   | 18.1 |
| Not explained, did not agree                                                                                     | 12    | 10.2 | 4      | 5.3  | 2       | 0.78 | 0       | 0.0  | 18    | 3.7  |
| Not explained, agreed                                                                                            | 1     | 8.5  | 2      | 2.6  | 19      | 7.1  | 1       | 4.6  | 32    | 6.6  |
| Explained, did not agree                                                                                         | 2     | 1.7  | 0      | 0.0  | 0       | 0.0  | 0       | 0.0  | 2     | 0.4  |
| Explained and agreed                                                                                             | 75    | 63.6 | 68     | 89.5 | 243     | 91.0 | 18      | 81.8 | 404   | 83.6 |
| Don't know/refuse                                                                                                | 19    | 16.1 | 2      | 2.6  | 3       | 1.1  | 3       | 13.6 | 27    | 5.6  |
| <b>Episiotomy (among n=2187 vaginal births)</b>                                                                  | 92    | 12.8 | 52     | 9.2  | 250     | 68.7 | 132     | 24.5 | 526   | 24.1 |
| Not explained, did not agree                                                                                     | 28    | 30.4 | 19     | 36.5 | 10      | 4.0  | 37      | 28.0 | 94    | 17.9 |
| Not explained, agreed                                                                                            | 6     | 6.5  | 19     | 36.5 | 154     | 61.6 | 13      | 9.9  | 192   | 36.5 |
| Explained, did not agree                                                                                         | 4     | 4.3  | 0      | 0.0  | 2       | 0.8  | 3       | 2.3  | 9     | 1.7  |
| Explained and agreed                                                                                             | 42    | 45.7 | 12     | 23.1 | 73      | 29.2 | 65      | 49.2 | 192   | 36.5 |
| Don't know/refuse                                                                                                | 12    | 13.0 | 2      | 3.8  | 11      | 4.4  | 14      | 10.6 | 39    | 7.4  |
| <b>Induction of labor</b>                                                                                        | 125   | 15.0 | 3      | 0.5  | 173     | 27.4 | 48      | 8.6  | 349   | 13.1 |
| Not explained, did not agree                                                                                     | 13    | 10.4 | 1      | 33.3 | 0       | 0.0  | 1       | 2.1  | 15    | 4.3  |
| Not explained, agreed                                                                                            | 10    | 8.0  | 0      | 0.0  | 57      | 32.9 | 8       | 16.7 | 75    | 21.5 |
| Explained, did not agree                                                                                         | 1     | 0.8  | 0      | 0.0  | 3       | 1.7  | 0       | 0.0  | 4     | 1.1  |
| Explained and agreed                                                                                             | 84    | 67.2 | 2      | 66.7 | 111     | 64.2 | 38      | 79.2 | 235   | 67.3 |
| Don't know/refuse/missing                                                                                        | 17    | 13.6 | 0      | 0.0  | 2       | 1.2  | 1       | 2.1  | 20    | 5.7  |
| <b>Vaginal exams</b>                                                                                             |       |      |        |      |         |      |         |      |       |      |
| Did not have any vaginal exam                                                                                    | 28    | 3.4  | 55     | 8.5  | 126     | 20.0 | 18      | 3.2  | 227   | 8.5  |
| <i>Before a vaginal examination, did staff inform woman why a vaginal exam was needed and obtain permission?</i> |       |      |        |      |         |      |         |      |       |      |
| Not informed, permission not obtained                                                                            | 138   | 17.1 | 178    | 30.2 | 113     | 22.4 | 142     | 26.2 | 571   | 23.4 |
| Not informed, permission obtained                                                                                | 40    | 5.0  | 12     | 2.0  | 21      | 4.2  | 78      | 14.4 | 151   | 6.2  |
| Informed, permission not obtained                                                                                | 201   | 24.9 | 104    | 17.7 | 98      | 19.4 | 89      | 16.4 | 492   | 20.1 |
| Informed and permission obtained                                                                                 | 409   | 50.6 | 293    | 49.8 | 268     | 53.1 | 227     | 41.8 | 1197  | 49.0 |
| Don't know/refuse                                                                                                | 20    | 2.5  | 2      | 0.3  | 5       | 1.0  | 7       | 1.3  | 34    | 1.4  |
| <i>Staff member discussed private health information from vaginal exam so others could hear</i>                  |       |      |        |      |         |      |         |      |       |      |
| No                                                                                                               | 733   | 90.7 | 511    | 86.8 | 430     | 85.2 | 331     | 61.0 | 2005  | 82.0 |
| Yes                                                                                                              | 55    | 6.8  | 67     | 11.4 | 71      | 14.1 | 210     | 38.7 | 403   | 16.5 |
| Refuse/don't know                                                                                                | 20    | 2.5  | 11     | 1.9  | 4       | 0.8  | 2       | 0.4  | 37    | 1.5  |
| <i>Vaginal exam conducted privately, so others could not see</i>                                                 |       |      |        |      |         |      |         |      |       |      |
| No                                                                                                               | 236   | 29.2 | 292    | 49.6 | 131     | 25.9 | 365     | 67.2 | 1024  | 41.9 |
| Yes                                                                                                              | 558   | 69.1 | 293    | 49.8 | 372     | 73.7 | 178     | 32.8 | 1401  | 57.3 |
| Refuse/don't know                                                                                                | 14    | 1.7  | 4      | 0.7  | 2       | 0.4  | 0       | 0.0  | 20    | 0.8  |
| <i>General description of experience of vaginal examinations (n=2445 who had VE)</i>                             |       |      |        |      |         |      |         |      |       |      |
| Comfortable                                                                                                      | 71    | 8.8  | 153    | 26.0 | 375     | 74.3 | 46      | 8.5  | 645   | 26.4 |
| A little uncomfortable                                                                                           | 142   | 17.6 | 193    | 32.8 | 93      | 18.4 | 141     | 26.0 | 569   | 23.3 |
| Quite uncomfortable                                                                                              | 217   | 26.9 | 125    | 21.2 | 21      | 4.2  | 144     | 26.5 | 507   | 20.7 |
| Very uncomfortable                                                                                               | 371   | 45.9 | 115    | 19.5 | 11      | 2.2  | 203     | 37.4 | 700   | 28.6 |
| Unknown                                                                                                          | 7     | 0.9  | 3      | 0.5  | 5       | 1.0  | 9       | 1.7  | 24    | 1.0  |
| <b>Pain relief</b>                                                                                               |       |      |        |      |         |      |         |      |       |      |
| <i>Woman offered pain relief during time in hospital</i>                                                         |       |      |        |      |         |      |         |      |       |      |
| No                                                                                                               | 511   | 61.1 | 456    | 70.8 | 90      | 14.3 | 471     | 84.0 | 1528  | 57.2 |
| Yes                                                                                                              | 244   | 29.2 | 187    | 29.0 | 536     | 84.9 | 87      | 15.5 | 1054  | 39.4 |
| Refuse/don't know                                                                                                | 81    | 9.7  | 1      | 0.2  | 5       | 0.8  | 3       | 0.5  | 90    | 3.4  |
| <i>If the woman request pain relief, was she given pain relief?</i>                                              |       |      |        |      |         |      |         |      |       |      |
| Not requested, not received                                                                                      | 451   | 54.0 | 348    | 54.0 | 71      | 11.3 | 409     | 72.9 | 1279  | 47.9 |
| Not requested, received                                                                                          | 205   | 24.5 | 80     | 12.4 | 374     | 59.3 | 96      | 17.1 | 755   | 28.3 |
| Requested, not received                                                                                          | 40    | 4.8  | 67     | 10.4 | 15      | 2.4  | 29      | 5.2  | 151   | 5.7  |
| Requested and received                                                                                           | 45    | 5.4  | 145    | 22.5 | 166     | 26.3 | 22      | 3.9  | 378   | 14.1 |

## Web appendices

|                                                                                             |     |      |     |      |     |      |     |      |      |      |
|---------------------------------------------------------------------------------------------|-----|------|-----|------|-----|------|-----|------|------|------|
| Refuse/don't know                                                                           | 95  | 11.4 | 4   | 0.6  | 5   | 0.8  | 5   | 0.9  | 109  | 4.1  |
| <i>Woman denied pain relief during time in hospital</i>                                     |     |      |     |      |     |      |     |      |      |      |
| No                                                                                          | 652 | 78.0 | 623 | 96.7 | 592 | 93.8 | 491 | 87.5 | 2358 | 88.2 |
| Yes                                                                                         | 46  | 5.5  | 19  | 3.0  | 34  | 5.4  | 50  | 8.9  | 149  | 5.6  |
| Refuse/don't know                                                                           | 138 | 16.5 | 2   | 0.3  | 5   | 0.8  | 20  | 3.6  | 165  | 6.2  |
| <b>Neglect and abandonment</b>                                                              |     |      |     |      |     |      |     |      |      |      |
| <i>Was a staff member present when the baby came out? (among n=2187 vaginal births)</i>     |     |      |     |      |     |      |     |      |      |      |
| No                                                                                          | 24  | 3.4  | 2   | 0.4  | 2   | 0.6  | 16  | 3.0  | 44   | 2.0  |
| Yes                                                                                         | 692 | 96.5 | 564 | 99.5 | 362 | 99.5 | 522 | 96.9 | 2140 | 97.9 |
| Refuse/don't know                                                                           | 1   | 0.1  | 1   | 0.2  | 0   | 0.0  | 1   | 0.2  | 3    | 0.1  |
| <i>Waited for long periods of time before attended by health workers</i>                    |     |      |     |      |     |      |     |      |      |      |
| Agree                                                                                       | 281 | 33.6 | 75  | 11.7 | 139 | 22.0 | 92  | 16.4 | 587  | 22.0 |
| Disagree                                                                                    | 553 | 66.2 | 566 | 87.9 | 491 | 77.8 | 468 | 83.4 | 2078 | 77.8 |
| Unknown                                                                                     | 2   | 0.2  | 3   | 0.5  | 1   | 0.2  | 1   | 0.2  | 7    | 0.3  |
| <i>Felt ignored, neglected, or that presence was a nuisance for health workers or staff</i> |     |      |     |      |     |      |     |      |      |      |
| Agree                                                                                       | 137 | 16.5 | 72  | 11.3 | 121 | 19.4 | 104 | 18.6 | 434  | 16.4 |
| Disagree                                                                                    | 696 | 83.6 | 565 | 88.7 | 502 | 80.6 | 455 | 81.4 | 2218 | 83.6 |
| <b>Poor rapport</b>                                                                         |     |      |     |      |     |      |     |      |      |      |
| <b>Communication</b>                                                                        |     |      |     |      |     |      |     |      |      |      |
| <i>Language interpretation</i>                                                              |     |      |     |      |     |      |     |      |      |      |
| Did not need an interpreter                                                                 | 824 | 98.6 | 629 | 97.7 | 630 | 99.8 | 559 | 99.6 | 2642 | 98.9 |
| Needed an interpreter and had one present                                                   | 8   | 1.0  | 12  | 1.9  | 0   | 0.0  | 0   | 0.0  | 20   | 0.7  |
| Needed an interpreter and did not have one present                                          | 2   | 0.2  | 3   | 0.5  | 0   | 0.0  | 2   | 0.4  | 7    | 0.3  |
| Don't know/refuse                                                                           | 2   | 0.2  | 0   | 0.0  | 1   | 0.2  | 0   | 0.0  | 3    | 0.1  |
| <i>Health workers or staff listened and responded to my concerns</i>                        |     |      |     |      |     |      |     |      |      |      |
| Agree                                                                                       | 713 | 85.3 | 528 | 82.0 | 400 | 63.4 | 487 | 86.8 | 2128 | 79.6 |
| Disagree                                                                                    | 105 | 12.6 | 113 | 17.6 | 200 | 31.7 | 59  | 10.5 | 477  | 17.9 |
| Unknown                                                                                     | 18  | 2.2  | 3   | 0.5  | 31  | 4.9  | 15  | 2.7  | 67   | 2.5  |
| <b>Supportive care</b>                                                                      |     |      |     |      |     |      |     |      |      |      |
| <i>Allowed to have a labor companion during labor and birth?</i>                            |     |      |     |      |     |      |     |      |      |      |
| No                                                                                          | 486 | 58.1 | 336 | 52.2 | 5   | 0.8  | 373 | 66.5 | 1200 | 44.9 |
| Yes                                                                                         | 342 | 40.9 | 305 | 47.4 | 626 | 99.2 | 187 | 33.3 | 1460 | 54.6 |
| Refuse/don't know                                                                           | 8   | 1.0  | 3   | 0.5  | 0   | 0.0  | 1   | 0.2  | 12   | 0.4  |
| <i>Had a labor companion present at any point</i>                                           |     |      |     |      |     |      |     |      |      |      |
| No                                                                                          | 437 | 52.3 | 560 | 87.0 | 1   | 0.2  | 320 | 57.0 | 1318 | 49.3 |
| Yes                                                                                         | 395 | 47.3 | 82  | 12.7 | 629 | 99.7 | 240 | 42.8 | 1346 | 50.4 |
| Refuse/don't know                                                                           | 4   | 0.5  | 2   | 0.3  | 1   | 0.2  | 1   | 0.2  | 8    | 0.3  |
| <b>Supportive care</b>                                                                      |     |      |     |      |     |      |     |      |      |      |
| <b>Autonomy</b>                                                                             |     |      |     |      |     |      |     |      |      |      |
| <i>Easy access to water or oral fluids (n=2187 women with vaginal birth)</i>                |     |      |     |      |     |      |     |      |      |      |
| No                                                                                          | 89  | 12.4 | 74  | 13.1 | 50  | 13.7 | 214 | 39.7 | 427  | 19.5 |
| Yes                                                                                         | 619 | 86.3 | 489 | 86.2 | 311 | 85.4 | 322 | 59.7 | 1741 | 79.6 |
| Refuse/don't know                                                                           | 9   | 1.3  | 4   | 0.7  | 3   | 0.8  | 3   | 0.6  | 19   | 0.9  |
| <i>Allowed to eat (n=2187) women with vaginal birth)</i>                                    |     |      |     |      |     |      |     |      |      |      |
| No                                                                                          | 298 | 41.6 | 82  | 14.5 | 1   | 0.3  | 327 | 60.7 | 708  | 32.4 |
| Yes                                                                                         | 398 | 55.5 | 478 | 84.3 | 362 | 99.5 | 200 | 37.1 | 1438 | 65.8 |
| Refuse/don't know                                                                           | 21  | 2.9  | 7   | 1.2  | 1   | 0.3  | 12  | 2.2  | 41   | 1.9  |
| <i>Woman told she could mobilize during labor, and if she mobilized during labor</i>        |     |      |     |      |     |      |     |      |      |      |
| Not told, did not mobilize                                                                  | 582 | 69.6 | 29  | 4.5  | 202 | 32.0 | 443 | 79.0 | 1256 | 47.0 |
| Told, did not mobilize                                                                      | 42  | 5.0  | 15  | 2.3  | 34  | 5.4  | 13  | 2.3  | 104  | 3.9  |
| Not told, mobilized                                                                         | 83  | 9.9  | 16  | 2.5  | 81  | 12.8 | 67  | 11.9 | 247  | 9.2  |
| Told and mobilized                                                                          | 118 | 14.1 | 584 | 90.7 | 306 | 48.5 | 34  | 6.1  | 1042 | 39.0 |
| Don't know/refuse                                                                           | 11  | 1.3  | 0   | 0.0  | 8   | 1.3  | 4   | 0.7  | 23   | 0.9  |
| <b>Preferred birth position</b>                                                             |     |      |     |      |     |      |     |      |      |      |
| No                                                                                          | 810 | 96.9 | 517 | 80.3 | 512 | 81.1 | 526 | 93.8 | 2365 | 88.5 |
| Yes                                                                                         | 19  | 2.3  | 126 | 19.6 | 96  | 15.2 | 32  | 5.7  | 273  | 10.2 |
| Unknown                                                                                     | 7   | 0.8  | 1   | 0.2  | 23  | 3.7  | 3   | 0.5  | 34   | 1.2  |

## Web appendices

|                                                                                  |     |      |     |      |     |      |     |      |      |      |
|----------------------------------------------------------------------------------|-----|------|-----|------|-----|------|-----|------|------|------|
| <i>Actual birth position (for women with vaginal birth, n=2187)</i>              |     |      |     |      |     |      |     |      |      |      |
| Dorsal/supine                                                                    | 190 | 26.5 | 565 | 99.7 | 18  | 5.0  | 473 | 87.8 | 1246 | 57.0 |
| Lithotomy                                                                        | 510 | 71.1 | 1   | 0.2  | 338 | 92.9 | 57  | 10.6 | 906  | 41.4 |
| On all fours                                                                     | 1   | 0.1  | 0   | 0.0  | 1   | 0.3  | 0   | 0.0  | 2    | 0.1  |
| Squatting or sitting                                                             | 3   | 0.4  | 1   | 0.2  | 1   | 0.3  | 5   | 0.9  | 10   | 0.5  |
| Lying on her side                                                                | 6   | 0.8  | 0   | 0.0  | 3   | 0.8  | 1   | 0.2  | 10   | 0.5  |
| Other/unknown                                                                    | 7   | 1.0  | 0   | 0.0  | 3   | 0.8  | 3   | 0.6  | 13   | 0.6  |
| <i>Woman or baby detained in hospital due to inability to pay hospital bills</i> |     |      |     |      |     |      |     |      |      |      |
| No                                                                               | 723 | 86.5 | 583 | 90.5 | 624 | 98.9 | 529 | 94.3 | 2459 | 92.0 |
| Yes                                                                              | 40  | 4.8  | 56  | 8.7  | 7   | 1.1  | 30  | 5.4  | 133  | 5.0  |
| Refuse/don't know                                                                | 73  | 8.7  | 5   | 0.8  | 0   | 0.0  | 2   | 0.4  | 80   | 3.0  |
| <i>Curtains, partitions or other privacy measures used</i>                       |     |      |     |      |     |      |     |      |      |      |
| No                                                                               | 65  | 7.8  | 339 | 52.6 | 330 | 52.3 | 468 | 83.4 | 1202 | 45.0 |
| Yes                                                                              | 763 | 91.3 | 299 | 46.4 | 296 | 46.9 | 93  | 16.6 | 1451 | 54.3 |
| Refuse/don't know                                                                | 8   | 1.0  | 6   | 0.9  | 5   | 0.8  | 0   | 0.0  | 19   | 0.7  |
| <i>Staff suggested or asked for a bribe, informal payment, or gift</i>           |     |      |     |      |     |      |     |      |      |      |
| No                                                                               | 726 | 86.8 | 320 | 49.7 | 370 | 58.6 | 490 | 87.3 | 1906 | 71.3 |
| Yes                                                                              | 104 | 12.4 | 306 | 47.5 | 255 | 40.4 | 60  | 10.7 | 725  | 27.1 |
| Refuse/don't know                                                                | 6   | 0.7  | 18  | 2.8  | 6   | 1.0  | 11  | 2.0  | 41   | 1.5  |
| <i>Asked to clean up own blood, urine, feces or amniotic fluid after birth</i>   |     |      |     |      |     |      |     |      |      |      |
| No                                                                               | 827 | 98.9 | 636 | 98.8 | 528 | 83.7 | 554 | 98.8 | 2545 | 95.2 |
| Yes                                                                              | 8   | 1.0  | 6   | 0.9  | 99  | 15.7 | 5   | 0.9  | 118  | 4.4  |
| Refuse/don't know                                                                | 1   | 0.1  | 2   | 0.3  | 4   | 0.6  | 2   | 0.4  | 9    | 0.3  |

## Web appendices

### Comparison of our study to other mistreatment studies using labor observation and community-based surveys

#### Labor observations

Other studies exploring the prevalence of mistreatment during childbirth have used labor observations, but different periods of interest, measurement tools and outcomes, which complicates comparison. Seven studies conducted in LMICs (Ethiopia, India, Kenya, Madagascar, Malawi, Rwanda and Tanzania) have used direct observations of labor and childbirth to measure how women are treated during childbirth,<sup>1-7</sup> based on criteria in Bowser and Hill's landscape analysis.<sup>8,9</sup> The studies had variable periods of observation: admission to immediate postpartum and newborn care,<sup>3,5-7</sup> second-stage of labor to two-hours postpartum,<sup>1</sup> intermittently during admission, first-stage of labor, and immediate postpartum, and continuously during the second- and third-stage of labor,<sup>2</sup> and admission to one-hour postpartum.<sup>4</sup> Continuous coverage of the observations also varied, including sixteen-hours per day in two eight-hour shifts,<sup>1,5</sup> 24-hour coverage in three shifts,<sup>3,4,6</sup> and each observer conducting five observations per day.<sup>2</sup> Most observers had a clinical background (nurse, midwife, doctor), but were not employed at the study site,<sup>1-5,7</sup> In our study, 14·0% of women experienced physical abuse and 37·8% of women experienced verbal abuse. Other labor observations conducted in Ethiopia, Malawi and Kenya reported lower levels of physical abuse (0·2% to 9·0%) and verbal abuse (1·9% to 18·1%),<sup>1,2,5</sup> and similar levels of providers not explaining procedures to women (17·1% to 77·0%),<sup>2,5</sup> and not informing women what will happen during a vaginal examination (20·5% to 81·0%).<sup>2,3</sup> About one quarter of women in Tanzania<sup>3</sup> and one-third of women in Kenya<sup>10</sup> had insufficient curtains or partitions during labor and childbirth, compared to almost half in our study. In Malawi, 88% of women did not have a labor companion present at the time of birth,<sup>2</sup> similar to our study.

#### Postpartum surveys

Fifteen existing studies have measured women-reported experiences of mistreatment during childbirth using survey methodology in Brazil, India, Ethiopia, Tanzania, India, Pakistan, Kenya, Peru and Nigeria.<sup>3,6,7,10-21</sup> Eight of these studies used community-based interviews,<sup>7,11-16,22</sup> eight used facility-based interviews<sup>3,6,10,17,18,20-22</sup> (Kruk et al used both community- and facility-based interviews). Six of the studies using facility-based interviews were conducted during the postpartum period prior to discharge,<sup>3,6,10,17,18,22</sup> and two were conducted at immunization clinic at around 6 weeks postpartum.<sup>20,21</sup> Among studies using community-based surveys, the timing of the interview varied substantially including up to: 2-4 weeks postpartum,<sup>7</sup> 8 weeks postpartum,<sup>15</sup> 5-10 weeks postpartum,<sup>22</sup> 12 weeks postpartum,<sup>11</sup> one year postpartum,<sup>12,16</sup> two years postpartum,<sup>13</sup> and five years postpartum.<sup>14</sup> Four existing studies measured women-reported experiences of mistreatment during childbirth within a similar time period (2-12 weeks postpartum) and in a community setting.<sup>7,11,15,22</sup> In our study, 10·7% reported any physical abuse and 30·7% reported any verbal abuse. In Uttar Pradesh, less than 1% of women reported being beaten or slapped and 2·6% of women reported providers using bad or abusive language.<sup>7</sup> In Gujrat, Pakistan, 19·2% of women reported physical abuse. In Pelotas, Brazil, 5% of women reported physical abuse and 10% of women reported verbal abuse.<sup>11</sup> In Tanga, Tanzania, 5·1% of women reported physical abuse and 18·9% of women reported non-dignified care.<sup>18</sup> Afulani and colleagues used facility-based surveys to



## Web appendices

measure person-centered maternity care in Ghana, India and Kenya, and found that approximately two-thirds of women reported that providers did not explain the purpose of examinations or procedures.<sup>23</sup>

The timing and location of the interviews may impact estimates of mistreatment in several ways. Facility-based interviews (exit or at immunization clinic) may underestimate mistreatment if women are concerned that disclosure may impact care received for her or her baby, or due to courtesy or social desirability bias. Women's recall may affect community-based interviews conducted longer after her birth (e.g. more than 6-months postpartum). For example, Kruk and colleagues used exit and community-based follow-up interviews with the same women and found that women reported higher rates of any abusive or disrespectful treatment during childbirth in the follow-up (28.2%) compared to the exit (19.5%) interviews.<sup>22</sup>

### References

1. Sheferaw ED, Bazant E, Gibson H, et al. Respectful maternity care in Ethiopian public health facilities. *Reprod Health* 2017; **14**(1): 60.
2. Sethi R, Gupta S, Oseni L, Mtimuni A, Rashidi T, Kachale F. The prevalence of disrespect and abuse during facility-based maternity care in Malawi: evidence from direct observations of labor and delivery. *Reprod Health* 2017; **14**(1): 111.
3. Sando D, Ratcliffe H, McDonald K, et al. The prevalence of disrespect and abuse during facility-based childbirth in urban Tanzania. *BMC Pregnancy Childbirth* 2016; **16**: 236.
4. Abuya T, Ndwiga C, Ritter J, et al. The effect of a multi-component intervention on disrespect and abuse during childbirth in Kenya. *BMC Pregnancy Childbirth* 2015; **15**: 224.
5. Rosen HE, Lynam PF, Carr C, et al. Direct observation of respectful maternity care in five countries: a cross-sectional study of health facilities in East and Southern Africa. *BMC Pregnancy Childbirth* 2015; **15**: 306.
6. Banks KP, Karim AM, Ratcliffe HL, Betemariam W, Langer A. Jeopardizing quality at the frontline of healthcare: prevalence and risk factors for disrespect and abuse during facility-based childbirth in Ethiopia. *Health Policy Plan* 2018; **33**(3): 317-27.
7. Dey A, Shakya HB, Chandurkar D, et al. Discordance in self-report and observation data on mistreatment of women by providers during childbirth in Uttar Pradesh, India. *Reprod Health* 2017; **14**(1): 149.
8. Bowser D, Hill K. Exploring Evidence for Disrespect and Abuse in Facility-Based Childbirth: Report of a Landscape Analysis: USAID, 2010.
9. White Ribbon Alliance. Respectful Maternity Care: The Universal Rights of Childbearing Women: White Ribbon Alliance, October 2011.
10. Abuya T, Warren CE, Miller N, et al. Exploring the prevalence of disrespect and abuse during childbirth in Kenya. *PLoS ONE* 2015; **10**(4).
11. Mesenburg MA, Victora CG, Jacob Serruya S, et al. Disrespect and abuse of women during the process of childbirth in the 2015 Pelotas birth cohort. *Reprod Health* 2018; **15**(1): 54.
12. Wassihun B, Deribe L, Worede N, Gultie T. Prevalence of disrespect and abuse of women during child birth and associated factors in Bahir Dar town, Ethiopia. *Epidemiology and health* 2018; **40**: e2018029.
13. Bishanga DR, Massenga J, Mwanamsangu AH, et al. Women's Experience of Facility-Based Childbirth Care and Receipt of an Early Postnatal Check for Herself and Her Newborn in Northwestern Tanzania. *Int J Environ Res Public Health* 2019; **16**(3).
14. Diamond-Smith N, Sudhinaraset M, Melo J, Murthy N. The relationship between women's experiences of mistreatment at facilities during childbirth, types of support received and person providing the support in Lucknow, India. *Midwifery* 2016; **40**: 114-23.
15. Azhar Z, Oyebo O, Masud H. Disrespect and abuse during childbirth in district Gujrat, Pakistan: A quest for respectful maternity care. *PLoS One* 2018; **13**(7): e0200318.
16. Hameed W, Avan BI. Women's experiences of mistreatment during childbirth: A comparative view of home- and facility-based births in Pakistan. *PLoS One* 2018; **13**(3): e0194601.
17. Asefa A, Bekele D. Status of respectful and non-abusive care during facility-based childbirth in a hospital and health centers in Addis Ababa, Ethiopia. *Reprod Health* 2015; **12**: 33.
18. Montesinos-Segura R, Urrunaga-Pastor D, Mendoza-Chuctaya G, et al. Disrespect and abuse during childbirth in fourteen hospitals in nine cities of Peru. *Int J Gynaecol Obstet* 2018; **140**(2): 184-90.
19. Kujawski S, Mbaruku G, Freedman LP, Ramsey K, Moyo W, Kruk ME. Association Between Disrespect and Abuse During Childbirth and Women's Confidence in Health Facilities in Tanzania. *Maternal and child health journal* 2015; **19**(10): 2243-50.
20. Okafor I, Ugwu E, Obi SN. Disrespect and abuse during facility-based childbirth in a low-income country. *Int J Gynaecol Obstet* 2015; **128**(2): 110-3.
21. Ijadunola MY, Olotu EA, Oyedun OO, et al. Lifting the veil on disrespect and abuse in facility-based child birth care: findings from South West Nigeria. *BMC Pregnancy Childbirth* 2019; **19**(1): 39.
22. Kruk ME, Kujawski S, Mbaruku G, Ramsey K, Moyo W, Freedman LP. Disrespectful and abusive treatment during facility delivery in Tanzania: a facility and community survey. *Health Policy and Planning* 2014.
23. Afulani PA, Phillips B, Aborigo RA, Moyer CA. Person-centred maternity care in low-income and middle-income countries: analysis of data from Kenya, Ghana, and India. *The Lancet Global Health* 2019; **7**(1): e96-e109.

## Web appendices

### Labor observation: Assessing the presence of the Hawthorne effect, by country and month of recruitment, based on any experience of physical abuse, verbal abuse, or stigma and discrimination.

Observations may be limited by the risk of the Hawthorne effect as the presence of observers may alter the provider's behavior and result in underestimation of mistreatment. We explored this by study site, country and month of recruitment and found no evidence of the presence of the Hawthorne effect in the following tables. We note that the analysis below is limited because it was not possible to record the rate of mistreatment events before data collection started – ideally, this would have occurred in the month prior to the project start date. Therefore, it is possible that having an observer present from the start of data collection (month 1) may have influenced staff behavior. We hypothesize that the risk of influencing staff behavior may be low, because we did not conduct any quality improvement or quality of care training with providers as part of the study implementation, but are unable to prove this hypothesis from our data.

| <b>NIGERIA</b>            |            |            |            |                 |         |
|---------------------------|------------|------------|------------|-----------------|---------|
| Any mistreatment (%)      |            |            |            |                 |         |
|                           | Facility 1 | Facility 2 | Facility 3 | Nigeria Overall | P-value |
| Month 1                   | 45%        | 63%        | 60%        | 55%             | NS      |
| Month 1: Labor ward admit | n=42       | n=22       | n=37       |                 |         |
| Month 2                   | 62%        | 100%       | 62%        | 63%             | NS      |
| Month 2: Labor ward admit | n=83       | n=6        | n=52       |                 |         |
| Month 3                   | 88%        | 62%        | 72%        | 79%             | NS      |
| Month 3: Labor ward admit | n=44       | n=13       | n=11       |                 |         |
| Month 4                   | 71%        | 85%        | 0%         | 81%             | NS      |
| Month 4: Labor ward admit | n=14       | n=54       | n=1        |                 |         |
| <b>GUINEA</b>             |            |            |            |                 |         |
| Any mistreatment (%)      |            |            |            |                 |         |
|                           | Facility 1 | Facility 2 | Facility 3 | Guinea Overall  | P-value |
| Month 1                   | 41%        | 46%        | 47%        | 45%             | NS      |
| Month 1: Labor ward admit | n=44       | n=41       | n=36       |                 |         |
| Month 2                   | 49%        | 34%        | 45%        | 44%             | NS      |
| Month 2: Labor ward admit | n=111      | n=70       | n=80       |                 |         |
| Month 3                   | 36%        | 33%        | 44%        | 38%             | NS      |
| Month 3: Labor ward admit | n=111      | n=60       | n=50       |                 |         |
| Month 4                   | 19%        | 35%        | 36%        | 31%             | NS      |
| Month 4: Labor ward admit | n=57       | n=51       | n=69       |                 |         |
| <b>GHANA</b>              |            |            |            |                 |         |
| Any mistreatment (%)      |            |            |            |                 |         |
|                           | Facility 1 | Facility 2 | Facility 3 | Ghana Overall   | P-value |
| Month 1                   | 34%        | 31%        | 41%        | 36%             | NS      |
| Month 1: Labor ward admit | n=125      | n=77       | n=129      |                 |         |
| Month 2                   | 40%        | 37%        | 30%        | 35%             | NS      |
| Month 2: Labor ward admit | n=121      | n=87       | n=152      |                 |         |
| Month 3                   | 32%        | 14%        | 39%        | 25%             | NS      |
| Month 3: Labor ward admit | n=59       | n=79       | n=33       |                 |         |
| Month 4                   | 0%         | 7%         | N/A        | 7%              | N/A     |
| Month 4: Labor ward admit | n=3        | n=57       | N/A        |                 |         |

## Web appendices

| OVERALL BY COUNTRY |                      |       |        |
|--------------------|----------------------|-------|--------|
|                    | Any mistreatment (%) |       |        |
|                    | Nigeria              | Ghana | Guinea |
| Month 1            | 55%                  | 36%   | 45%    |
| Month 2            | 63%                  | 35%   | 44%    |
| Month 3            | 79%                  | 25%   | 38%    |
| Month 4            | 81%                  | 7%    | 31%    |
| Month 5            | 78%                  | -     | -      |
| Month 6            | 75%                  | -     | -      |

NS: Not significant
